# Supplementary material for: Electrosynthetic access to unsymmetrical oxaza[8]helicenes with high chiral stability and strong circularly polarized luminescence (CPL)
Source: Beilstein J Org Chem. 2026 Feb 25;22:372–82. doi: 10.3762/bjoc.22.25 (PMC12951319; doi:10.3762/bjoc.22.25)
Supplement: File 2 — Cartesian coordinates of DFT calculations. [file Beilstein_J_Org_Chem-22-372-s002.xlsx]

## Sheet: 3
3
			# opt freq ub3lyp/6-31+g(d,p) scrf=(iefpcm,solvent=dichloromethane) ge om=connectivity iop(3/124=40)
			Charge = 0, Multiplicity = 1, Point group = C1
			Electronic Energy = -1170.412766 Hartree
			Number of imaginary frequencies = 0
			Sum of electronic and zero-point Energies = -1170.030842 Hartree
			Sum of electronic and thermal Energies = -1170.009552 Hartree
			Sum of electronic and thermal Enthalpies = -1170.008608 Hartree
			Sum of electronic and thermal Free Energies = -1170.081821 Hartree
Atoms	Cartesian Coordinates			Atoms	Cartesian Coordinates
	X	Y	Z		X	Y	Z
C	-1.032567	1.335221	0.027719	C	0.380957	1.202633	-0.067854
C	0.672284	-0.226286	-0.018700	C	-0.590290	-0.875661	0.008100
N	-1.604311	0.066273	0.094583	C	1.855074	-1.030220	-0.084708
C	1.685969	-2.415759	-0.388642	C	0.389368	-3.002814	-0.408834
C	-0.745704	-2.263576	-0.163841	C	3.204931	-0.556535	0.170370
C	4.319523	-1.379324	-0.185672	C	4.094052	-2.711313	-0.660942
C	2.830807	-3.223255	-0.693111	C	3.473916	0.643307	0.872579
C	4.768554	1.076475	1.100328	C	5.863535	0.317801	0.637920
C	5.635872	-0.898682	0.022060	C	-2.997801	-0.219195	0.121004
C	-3.827234	0.222977	-0.914604	C	-5.191647	-0.063222	-0.879435
C	-5.752591	-0.804451	0.171781	C	-4.902008	-1.250544	1.193374
C	-3.538212	-0.954928	1.178996	C	-7.233819	-1.089669	0.212787
C	-1.670652	2.578265	0.014807	C	-0.892108	3.716721	-0.158630
C	0.499892	3.603019	-0.333928	C	1.140812	2.369083	-0.288697
O	1.188208	4.777245	-0.553236	H	0.308119	-4.065792	-0.615787
H	-1.729634	-2.718062	-0.159220	H	4.950267	-3.323506	-0.928743
H	2.664415	-4.259671	-0.973609	H	2.649211	1.210056	1.281522
H	4.939168	1.995763	1.652400	H	6.878089	0.667968	0.801309
H	6.470295	-1.524459	-0.282637	H	-3.401010	0.778714	-1.743197
H	-5.828357	0.283646	-1.688598	H	-5.311634	-1.829606	2.016216
H	-2.890951	-1.291993	1.982120	H	-7.639448	-1.230368	-0.793460
H	-7.450221	-1.986192	0.800291	H	-7.778596	-0.255258	0.671159
H	-2.746952	2.654767	0.118363	H	-1.346922	4.701111	-0.181250
H	2.210855	2.319600	-0.447439	H	2.132337	4.591016	-0.650990

## Sheet: 3-O- (CB)
3CB
			# opt freq ub3lyp/6-31+g(d,p) scrf=(iefpcm,solvent=dichloromethane) ge om=connectivity iop(3/124=40)
			Charge = -1, Multiplicity = 1, Point group = C1
			Electronic Energy = -1169.919486 Hartree
			Number of imaginary frequencies = 0
			Sum of electronic and zero-point Energies = -1169.550983 Hartree
			Sum of electronic and thermal Energies = -1169.530042 Hartree
			Sum of electronic and thermal Enthalpies = -1169.529098 Hartree
			Sum of electronic and thermal Free Energies = -1169.601718 Hartree
Atoms	Cartesian Coordinates			Atoms	Cartesian Coordinates
	X	Y	Z		X	Y	Z
C	-1.027418	1.362532	0.039851	C	0.383943	1.244305	-0.081879
C	0.679065	-0.191721	-0.029530	C	-0.581764	-0.853188	0.017727
N	-1.598341	0.080166	0.120020	C	1.861685	-0.995247	-0.098843
C	1.699526	-2.386267	-0.395713	C	0.406782	-2.978976	-0.413176
C	-0.728676	-2.240933	-0.160228	C	3.214431	-0.521882	0.156054
C	4.332189	-1.347322	-0.187169	C	4.110670	-2.680946	-0.659581
C	2.846440	-3.191409	-0.696079	C	3.480554	0.683287	0.849554
C	4.774210	1.115968	1.085604	C	5.872395	0.351783	0.641036
C	5.647511	-0.867771	0.029415	C	-2.984309	-0.211965	0.134851
C	-3.832587	0.315135	-0.847471	C	-5.194752	0.019661	-0.824331
C	-5.743866	-0.814780	0.161799	C	-4.879815	-1.343461	1.130450
C	-3.517314	-1.039225	1.129306	C	-7.224117	-1.108920	0.190526
C	-1.662613	2.608030	0.038079	C	-0.889822	3.747769	-0.145050
C	0.538513	3.703913	-0.359873	C	1.141013	2.410042	-0.309301
O	1.220913	4.785387	-0.581370	H	0.327705	-4.042020	-0.622326
H	-1.710185	-2.701208	-0.152776	H	4.968506	-3.294287	-0.920635
H	2.680882	-4.228872	-0.975088	H	2.652067	1.265347	1.226833
H	4.939857	2.044963	1.622812	H	6.886333	0.702180	0.809573
H	6.483283	-1.496642	-0.266347	H	-3.418891	0.944571	-1.627845
H	-5.840610	0.434101	-1.593982	H	-5.277904	-1.993160	1.905214
H	-2.863365	-1.438787	1.897535	H	-7.625406	-1.229712	-0.820588
H	-7.437614	-2.020629	0.755535	H	-7.777844	-0.289020	0.664394
H	-2.738829	2.683096	0.161950	H	-1.367644	4.724698	-0.153542
H	2.209501	2.360629	-0.476059

## Sheet: Int-I
3NR
			# opt freq ub3lyp/6-31+g(d,p) scrf=(iefpcm,solvent=dichloromethane) ge om=connectivity iop(3/124=40)
			Charge = 0, Multiplicity = 2, Point group = C1
			Electronic Energy = -1169.781573 Hartree
			Number of imaginary frequencies = 0
			Sum of electronic and zero-point Energies = -1169.411854 Hartree
			Sum of electronic and thermal Energies = -1169.390917 Hartree
			Sum of electronic and thermal Enthalpies = -1169.389972 Hartree
			Sum of electronic and thermal Free Energies = -1169.463305 Hartree
Atoms	Cartesian Coordinates			Atoms	Cartesian Coordinates
	X	Y	Z		X	Y	Z
C	-1.041751	1.351920	0.027172	C	0.388464	1.239498	-0.065050
C	0.694333	-0.196398	-0.011947	C	-0.557715	-0.851043	0.003782
N	-1.586778	0.097883	0.080778	C	1.881136	-0.988241	-0.071281
C	1.715966	-2.379290	-0.366029	C	0.425530	-2.971725	-0.389673
C	-0.716841	-2.233759	-0.160997	C	3.229828	-0.502189	0.171263
C	4.344732	-1.325361	-0.178942	C	4.123391	-2.665352	-0.636469
C	2.864945	-3.185491	-0.663146	C	3.497032	0.711913	0.846934
C	4.791599	1.154269	1.057869	C	5.886099	0.390753	0.605133
C	5.659997	-0.838183	0.013273	C	-2.980154	-0.210504	0.110426
C	-3.803101	0.175933	-0.948487	C	-5.164440	-0.130426	-0.907953
C	-5.718961	-0.831655	0.171465	C	-4.868541	-1.219418	1.219568
C	-3.510276	-0.909527	1.198698	C	-7.191886	-1.154051	0.219596
C	-1.721160	2.592357	0.019029	C	-0.984442	3.733698	-0.161874
C	0.456950	3.684851	-0.363650	C	1.114224	2.395179	-0.303679
O	1.121620	4.741852	-0.581951	H	0.349707	-4.036064	-0.589741
H	-1.700219	-2.688675	-0.162027	H	4.982551	-3.275463	-0.899113
H	2.703498	-4.224969	-0.933592	H	2.674559	1.286195	1.248998
H	4.961056	2.087053	1.586584	H	6.899946	0.748479	0.754968
H	6.494749	-1.466055	-0.285483	H	-3.379387	0.702735	-1.796973
H	-5.801374	0.172712	-1.733639	H	-5.276173	-1.764528	2.066151
H	-2.861852	-1.201362	2.018221	H	-7.677855	-0.935859	-0.734628
H	-7.357872	-2.210053	0.456064	H	-7.694551	-0.565159	0.995595
H	-2.798456	2.625018	0.137761	H	-1.456524	4.710158	-0.179527
H	2.182930	2.389295	-0.469638

## Sheet: 3+.
3RC
			# opt freq ub3lyp/6-31+g(d,p) scrf=(iefpcm,solvent=dichloromethane) ge om=connectivity iop(3/124=40)
			Charge = 1, Multiplicity = 2, Point group = C1
			Electronic Energy = -1170.215208 Hartree
			Number of imaginary frequencies = 0
			Sum of electronic and zero-point Energies = -1169.833215 Hartree
			Sum of electronic and thermal Energies = -1169.812033 Hartree
			Sum of electronic and thermal Enthalpies = -1169.811089 Hartree
			Sum of electronic and thermal Free Energies = -1169.884014 Hartree
Atoms	Cartesian Coordinates			Atoms	Cartesian Coordinates
	X	Y	Z		X	Y	Z
C	-1.037050	1.335984	-0.007465	C	0.383609	1.210302	-0.074657
C	0.679905	-0.233146	-0.021458	C	-0.583612	-0.879612	-0.026172
N	-1.592996	0.072489	0.034011	C	1.850756	-1.022460	-0.061075
C	1.677650	-2.421722	-0.378963	C	0.384271	-3.007855	-0.421448
C	-0.753125	-2.263704	-0.206223	C	3.201822	-0.544195	0.193072
C	4.310082	-1.357978	-0.190188	C	4.079481	-2.685591	-0.676076
C	2.818366	-3.213959	-0.700781	C	3.470482	0.641374	0.906623
C	4.772342	1.073902	1.124348	C	5.858801	0.326051	0.640898
C	5.626308	-0.885556	0.008509	C	-2.985038	-0.219602	0.088998
C	-3.847672	0.318899	-0.870394	C	-5.206846	0.018750	-0.807194
C	-5.723487	-0.809716	0.200095	C	-4.833273	-1.339356	1.150222
C	-3.473150	-1.053713	1.102465	C	-7.195555	-1.119837	0.276646
C	-1.692080	2.576517	-0.007878	C	-0.925134	3.717779	-0.165035
C	0.471000	3.608555	-0.327018	C	1.132872	2.360702	-0.272444
O	1.149974	4.758437	-0.521937	H	0.304488	-4.067750	-0.637758
H	-1.738931	-2.710270	-0.236374	H	4.934164	-3.290757	-0.961968
H	2.662211	-4.247715	-0.991638	H	2.652969	1.199651	1.341482
H	4.947107	1.985835	1.685900	H	6.874184	0.674536	0.797706
H	6.457731	-1.505259	-0.313201	H	-3.455202	0.936795	-1.670151
H	-5.873768	0.426441	-1.560274	H	-5.212854	-1.978139	1.941864
H	-2.796418	-1.451785	1.850650	H	-7.721495	-0.783261	-0.619687
H	-7.365410	-2.194684	0.395387	H	-7.649639	-0.622933	1.141839
H	-2.767315	2.642226	0.102356	H	-1.379819	4.700926	-0.180044
H	2.207727	2.329575	-0.394273	H	2.101097	4.596778	-0.618844

## Sheet: excited state 5a
ex8hel
			# p opt freq td=(nstates=10)/6-311g(2d,p) scrf=(smd,solvent=chloroform ) geom=connectivity mn15
			Charge = 0, Multiplicity = 1, Point group = C1
			Electronic Energy = -1552.352510 Hartree
			Number of imaginary frequencies = 0
			Sum of electronic and zero-point Energies = -1551.767084 Hartree
			Sum of electronic and thermal Energies = -1551.738842 Hartree
			Sum of electronic and thermal Enthalpies = -1551.737898 Hartree
			Sum of electronic and thermal Free Energies = -1551.824866 Hartree
Atoms	Cartesian Coordinates			Atoms	Cartesian Coordinates
	X	Y	Z		X	Y	Z
C	1.862898	-1.110093	-0.231465	C	0.509083	-0.646199	-0.171232
C	0.565151	0.771475	-0.146153	C	1.947781	1.122453	0.058254
N	2.708852	-0.006079	-0.042042	C	-0.375038	1.843458	-0.287208
C	0.029887	3.119009	0.202262	C	1.376683	3.373161	0.549686
C	2.359660	2.409626	0.411950	C	2.234993	-2.394872	-0.540242
C	1.219419	-3.365367	-0.763015	C	-0.074930	-2.974533	-0.569115
C	-0.501451	-1.671520	-0.163748	C	-1.663126	1.714338	-0.899378
C	-2.631358	2.746545	-0.706949	C	-2.239231	3.953008	-0.060588
C	-0.945584	4.148598	0.325704	C	-2.014318	0.627275	-1.731371
C	-3.300264	0.485231	-2.203497	C	-4.291914	1.432895	-1.888132
C	-3.946383	2.562332	-1.178826	C	4.123103	-0.066557	0.064089
C	4.916244	0.751207	-0.738938	C	6.296611	0.696733	-0.624994
C	6.914471	-0.177609	0.272440	C	6.104676	-0.992428	1.062149
C	4.719756	-0.939086	0.968598	C	8.413065	-0.239927	0.369378
O	-1.142371	-3.829792	-0.646497	C	-2.221562	-3.138849	-0.196503
C	-1.867198	-1.819642	0.183331	C	-3.499009	-3.658797	-0.139213
C	-4.495289	-2.836307	0.376363	C	-4.203205	-1.551443	0.888342
C	-2.869656	-1.032287	0.854730	C	-5.220779	-0.761750	1.479099
C	-4.934974	0.452693	2.061529	C	-3.612769	0.917830	2.095606
C	-2.598809	0.176179	1.506200	H	1.636046	4.368232	0.894923
H	3.399812	2.622742	0.621607	H	3.279547	-2.660869	-0.641779
H	1.458740	-4.385937	-1.029423	H	-2.981777	4.732396	0.075604
H	-0.636775	5.096322	0.755134	H	-1.259168	-0.098400	-2.000811
H	-3.550842	-0.367414	-2.825024	H	-5.306306	1.296027	-2.242944
H	-4.677675	3.340353	-0.984474	H	4.442923	1.419051	-1.449657
H	6.909724	1.336606	-1.251230	H	6.565099	-1.672721	1.770648
H	4.096900	-1.563336	1.598807	H	8.728987	-0.859941	1.209363
H	8.841154	0.756563	0.499048	H	8.846360	-0.661631	-0.541515
H	-3.700591	-4.665203	-0.483118	H	-5.518898	-3.190896	0.426936
H	-6.235720	-1.146046	1.476609	H	-5.727806	1.040002	2.509827
H	-3.375900	1.855056	2.585893	H	-1.576647	0.529247	1.556991

## Sheet: excited state 6b
ex7helph
			# p opt freq td=(nstates=10)/6-311g(2d,p) scrf=(smd,solvent=chloroform ) geom=connectivity mn15
			Charge = 0, Multiplicity = 1, Point group = C1
			Electronic Energy = -1629.693700 Hartree
			Number of imaginary frequencies = 0
			Sum of electronic and zero-point Energies = -1629.077329 Hartree
			Sum of electronic and thermal Energies = -1629.047067 Hartree
			Sum of electronic and thermal Enthalpies = -1629.046123 Hartree
			Sum of electronic and thermal Free Energies = -1629.138344 Hartree
Atoms	Cartesian Coordinates			Atoms	Cartesian Coordinates
	X	Y	Z		X	Y	Z
C	2.291020	1.223981	0.110388	C	0.886386	1.066828	0.334233
C	0.680828	-0.300503	0.655185	C	1.923177	-0.973494	0.426489
N	2.879924	-0.045985	0.118495	C	-0.400096	-1.064705	1.209601
C	-0.272176	-2.487509	1.225315	C	0.941917	-3.106358	0.824190
C	2.050811	-2.367273	0.472558	C	2.936208	2.436885	0.023773
C	2.165832	3.624908	0.115953	C	0.809821	3.496752	0.209777
C	0.091374	2.260313	0.217810	C	-1.541750	-0.484090	1.790161
C	-2.582896	-1.265164	2.264568	C	-2.506676	-2.661497	2.171512
C	-1.364636	-3.258422	1.675638	O	-0.057284	4.559085	0.196443
C	-1.306631	4.037693	0.085219	C	-1.259684	2.619002	0.020256
C	-2.463930	4.780509	0.057610	C	-3.669992	4.075047	-0.078153
C	-3.697713	2.685082	-0.259512	C	-2.481612	1.924741	-0.290952
C	-4.913184	1.973067	-0.461916	C	-4.927809	0.621365	-0.701111
C	-3.728618	-0.121122	-0.808106	C	-2.521274	0.580634	-0.636456
C	4.253039	-0.312248	-0.129669	C	5.006838	-1.021557	0.803710
C	6.344946	-1.281468	0.551884	C	6.961995	-0.830648	-0.617632
C	6.194123	-0.114761	-1.534492	C	4.848304	0.140538	-1.302119
C	8.416579	-1.112841	-0.869998	C	-3.723417	-1.568073	-1.048443
C	-4.831441	-2.364416	-0.706419	C	-4.818274	-3.736594	-0.899567
C	-3.697129	-4.363712	-1.440663	C	-2.589341	-3.594112	-1.778889
C	-2.599092	-2.219306	-1.583954	H	0.995175	-4.189545	0.844767
H	2.991292	-2.842818	0.223980	H	4.012591	2.486971	-0.079351
H	2.627723	4.602159	0.069559	H	-1.591377	0.593934	1.880900
H	-3.455519	-0.792735	2.699549	H	-3.334023	-3.274070	2.510328
H	-1.284301	-4.340019	1.637123	H	-2.434762	5.858889	0.141721
H	-4.609852	4.616456	-0.080280	H	-5.845388	2.527958	-0.429876
H	-5.878891	0.125269	-0.856270	H	-1.582223	0.055988	-0.738902
H	4.538968	-1.356893	1.722346	H	6.928027	-1.834394	1.281185
H	6.654264	0.240804	-2.450249	H	4.253391	0.685131	-2.026453
H	8.739439	-0.698098	-1.825718	H	8.611268	-2.188046	-0.882987
H	9.041630	-0.681401	-0.084197	H	-5.701082	-1.903770	-0.252007
H	-5.685497	-4.323487	-0.618563	H	-3.688070	-5.436583	-1.592244
H	-1.708270	-4.064719	-2.200930	H	-1.730658	-1.642603	-1.881106

## Sheet: excited state 6a
ex7hel
			# p opt freq td=(nstates=10)/6-311g(2d,p) scrf=(smd,solvent=chloroform ) geom=connectivity mn15
			Charge = 0, Multiplicity = 1, Point group = C1
			Electronic Energy = -1398.860116 Hartree
			Number of imaginary frequencies = 0
			Sum of electronic and zero-point Energies = -1398.319634 Hartree
			Sum of electronic and thermal Energies = -1398.294857 Hartree
			Sum of electronic and thermal Enthalpies = -1398.293913 Hartree
			Sum of electronic and thermal Free Energies = -1398.373459 Hartree
Atoms	Cartesian Coordinates			Atoms	Cartesian Coordinates
	X	Y	Z		X	Y	Z
C	1.416096	-1.074170	-0.213036	C	0.095878	-0.516124	-0.244722
C	0.251892	0.887485	-0.246799	C	1.643936	1.158305	-0.013355
N	2.325552	-0.026669	-0.002240	C	-0.610836	2.004842	-0.520729
C	-0.098506	3.317907	-0.280526	C	1.253461	3.504224	0.114685
C	2.137311	2.446764	0.208174	C	1.714441	-2.384940	-0.491718
C	0.645435	-3.277412	-0.797750	C	-0.626190	-2.791808	-0.719571
C	-0.988500	-1.461954	-0.337656	C	-1.896640	1.869681	-1.064391
C	-2.706786	2.974712	-1.284293	C	-2.233438	4.255763	-0.975309
C	-0.950170	4.422415	-0.492884	O	-1.747744	-3.565816	-0.885305
C	-2.802436	-2.802487	-0.505872	C	-2.377156	-1.514585	-0.084261
C	-4.116686	-3.221490	-0.543328	C	-5.080721	-2.325449	-0.085545
C	-4.726795	-1.075604	0.471891	C	-3.356709	-0.663419	0.539539
C	-5.711853	-0.219298	1.023795	C	-5.365844	0.953113	1.659343
C	-4.016381	1.309512	1.795066	C	-3.030925	0.498928	1.248082
C	3.727747	-0.186675	0.148983	C	4.606482	0.519771	-0.665303
C	5.977234	0.357457	-0.504438	C	6.493874	-0.515887	0.450566
C	5.595147	-1.225341	1.251740	C	4.226095	-1.062889	1.112265
C	7.975980	-0.695812	0.623241	H	1.598579	4.516486	0.295604
H	3.180658	2.604011	0.450739	H	2.740753	-2.727552	-0.522952
H	0.829520	-4.314728	-1.043588	H	-2.251482	0.882238	-1.331388
H	-3.698674	2.841903	-1.698752	H	-2.867286	5.120397	-1.134265
H	-0.568071	5.416581	-0.284193	H	-4.372334	-4.206018	-0.913159
H	-6.129553	-2.600331	-0.109111	H	-6.752945	-0.516511	0.948120
H	-6.137702	1.590521	2.075018	H	-3.738946	2.208904	2.331354
H	-1.987893	0.759028	1.377617	H	4.212740	1.184866	-1.425265
H	6.658106	0.911234	-1.142060	H	5.978039	-1.908491	2.002953
H	3.534621	-1.605548	1.746638	H	8.532659	-0.107340	-0.107155
H	8.294562	-0.385717	1.621777	H	8.261108	-1.743934	0.504880

## Sheet: excited state 5b
ex8helph
			# p opt freq td=(nstates=10)/6-311g(2d,p) scrf=(smd,solvent=chloroform ) geom=connectivity mn15
			Charge = 0, Multiplicity = 1, Point group = C1
			Electronic Energy = -1783.187842 Hartree
			Number of imaginary frequencies = 0
			Sum of electronic and zero-point Energies = -1782.526049 Hartree
			Sum of electronic and thermal Energies = -1782.493122 Hartree
			Sum of electronic and thermal Enthalpies = -1782.492178 Hartree
			Sum of electronic and thermal Free Energies = -1782.589377 Hartree
Atoms	Cartesian Coordinates			Atoms	Cartesian Coordinates
	X	Y	Z		X	Y	Z
C	2.562129	1.210224	-0.002782	C	1.151689	1.046956	0.163784
C	0.943236	-0.303954	0.570766	C	2.204575	-0.973068	0.412065
N	3.164389	-0.049190	0.113297	C	-0.147456	-1.068428	1.089698
C	-0.028466	-2.487184	1.033476	C	1.204559	-3.103485	0.715629
C	2.343304	-2.363967	0.470961	C	3.199688	2.421427	-0.146237
C	2.416371	3.601573	-0.186231	C	1.057239	3.455443	-0.167423
C	0.353923	2.211373	-0.106793	C	-1.320702	-0.501827	1.694959
C	-2.468281	-1.325887	1.888895	C	-2.367147	-2.726464	1.654998
C	-1.173648	-3.287503	1.302432	O	0.183257	4.500687	-0.296085
C	-1.056014	3.954021	-0.423897	C	-0.994768	2.536312	-0.386071
C	-2.213898	4.684229	-0.552944	C	-3.407684	3.965513	-0.699259
C	-3.417644	2.565890	-0.791408	C	-2.199693	1.812515	-0.707792
C	-4.624639	1.843697	-1.005323	C	-4.627094	0.484433	-1.185969
C	-3.419746	-0.250493	-1.198433	C	-2.224115	0.447544	-0.967592
C	4.547559	-0.317018	-0.065781	C	5.259775	-0.985897	0.928242
C	6.608148	-1.250905	0.747912	C	7.276174	-0.845566	-0.410356
C	6.548714	-0.171051	-1.389407	C	5.193358	0.089167	-1.228528
C	8.741314	-1.131488	-0.585431	C	-3.401893	-1.700756	-1.427811
C	-4.496261	-2.504187	-1.067625	C	-4.468623	-3.878145	-1.254737
C	-3.346427	-4.491330	-1.807652	C	-2.252631	-3.710735	-2.167770
C	-2.277473	-2.335703	-1.977888	C	-1.374741	0.827440	2.166903
C	-2.554361	1.364065	2.634227	C	-3.729918	0.591208	2.670944
C	-3.672261	-0.743223	2.334663	H	1.245515	-4.187338	0.704369
H	3.299939	-2.834437	0.283326	H	4.279732	2.476284	-0.197768
H	2.868250	4.580538	-0.272900	H	-3.245490	-3.343974	1.810394
H	-1.083472	-4.363316	1.190461	H	-2.191479	5.766216	-0.539229
H	-4.349462	4.497115	-0.781062	H	-5.555145	2.400708	-1.046638
H	-5.564760	-0.026567	-1.371901	H	-1.287334	-0.093968	-0.962442
H	4.750207	-1.285710	1.837017	H	7.158658	-1.771633	1.524643
H	7.049076	0.147613	-2.297619	H	4.630890	0.599879	-2.001630
H	9.104495	-0.759828	-1.544376	H	8.939885	-2.205053	-0.539485
H	9.329645	-0.660552	0.206039	H	-5.363740	-2.046959	-0.603986
H	-5.323848	-4.475801	-0.960138	H	-3.326180	-5.564666	-1.955306
H	-1.373905	-4.173642	-2.602485	H	-1.423519	-1.743039	-2.286349
H	-0.475862	1.428697	2.160879	H	-2.577082	2.393961	2.972945
H	-4.659821	1.033172	3.008052	H	-4.549006	-1.377458	2.424310

## Sheet: 5a (1st)
g8hel
			# opt freq 6-311g(2d,p) scrf=(smd,solvent=chloroform) geom=connectivit y mn15
			Charge = 0, Multiplicity = 1, Point group = C1
			Electronic Energy = -1552.361304 Hartree
			Number of imaginary frequencies = 0
			Sum of electronic and zero-point Energies = -1551.872391 Hartree
			Sum of electronic and thermal Energies = -1551.844404 Hartree
			Sum of electronic and thermal Enthalpies = -1551.843460 Hartree
			Sum of electronic and thermal Free Energies = -1551.930614 Hartree
Atoms	Cartesian Coordinates			Atoms	Cartesian Coordinates
	X	Y	Z		X	Y	Z
C	-1.839758	-1.107863	0.255087	C	-0.495833	-0.665999	0.187938
C	-0.553834	0.783078	0.075739	C	-1.912654	1.097150	-0.131985
N	-2.683612	-0.034385	0.019598	C	0.366775	1.871831	0.192799
C	-0.057450	3.132519	-0.289078	C	-1.410555	3.353292	-0.654240
C	-2.356155	2.375173	-0.513459	C	-2.226588	-2.415342	0.580621
C	-1.244145	-3.356091	0.805780	C	0.075435	-2.965583	0.593352
C	0.492630	-1.690061	0.193386	C	1.661377	1.801274	0.839483
C	2.573619	2.876860	0.693707	C	2.164348	4.069236	0.017371
C	0.882812	4.208095	-0.397212	C	2.030367	0.732786	1.681803
C	3.281239	0.670115	2.252971	C	4.222971	1.682504	2.007949
C	3.861256	2.777360	1.258198	C	-4.100518	-0.092922	-0.069033
C	-4.883633	0.721375	0.746394	C	-6.265793	0.671069	0.646683
C	-6.894764	-0.199691	-0.246254	C	-6.095411	-1.012960	-1.047808
C	-4.708983	-0.958545	-0.971293	C	-8.394738	-0.259196	-0.327102
O	1.126095	-3.833137	0.687662	C	2.217109	-3.149493	0.261605
C	1.904042	-1.853912	-0.121839	C	3.502735	-3.711503	0.207643
C	4.495705	-2.933062	-0.316452	C	4.221356	-1.642656	-0.858952
C	2.905669	-1.100237	-0.809408	C	5.243857	-0.908213	-1.505480
C	4.973444	0.283643	-2.127534	C	3.653384	0.777259	-2.148115
C	2.646373	0.100187	-1.505336	H	-1.691845	4.340284	-1.005248
H	-3.401927	2.557171	-0.728057	H	-3.275056	-2.666991	0.679077
H	-1.476164	-4.373048	1.094228	H	2.881498	4.875699	-0.092787
H	0.537494	5.138267	-0.836839	H	1.309281	-0.043460	1.897891
H	3.538890	-0.166823	2.891797	H	5.215588	1.617294	2.437795
H	4.556792	3.595897	1.103437	H	-4.401005	1.386427	1.453695
H	-6.871154	1.310890	1.280540	H	-6.564912	-1.690714	-1.752854
H	-4.093066	-1.579544	-1.611978	H	-8.720630	-0.875831	-1.165806
H	-8.822613	0.738335	-0.449167	H	-8.819133	-0.683285	0.586826
H	3.677092	-4.717398	0.567945	H	5.512145	-3.306796	-0.374876
H	6.246938	-1.322361	-1.514826	H	5.764142	0.832888	-2.624791
H	3.429204	1.697710	-2.675412	H	1.630848	0.472305	-1.546634

## Sheet: 5a (2nd)
g8hel2
			# opt freq 6-31g(2d,p) scrf=(smd,solvent=chloroform) geom=connectivity mn15
			Charge = 0, Multiplicity = 1, Point group = C1
			Electronic Energy = -1552.069564 Hartree
			Number of imaginary frequencies = 0
			Sum of electronic and zero-point Energies = -1551.578515 Hartree
			Sum of electronic and thermal Energies = -1551.550607 Hartree
			Sum of electronic and thermal Enthalpies = -1551.549663 Hartree
			Sum of electronic and thermal Free Energies = -1551.636691 Hartree
Atoms	Cartesian Coordinates			Atoms	Cartesian Coordinates
	X	Y	Z		X	Y	Z
C	-1.841072	-1.104274	0.261553	C	-0.494903	-0.662419	0.193409
C	-0.553720	0.788143	0.076660	C	-1.914696	1.100828	-0.132878
N	-2.686298	-0.031295	0.022774	C	0.366537	1.880045	0.187989
C	-0.061699	3.141819	-0.295046	C	-1.415929	3.358949	-0.662389
C	-2.361394	2.377509	-0.518464	C	-2.231388	-2.411281	0.589527
C	-1.249403	-3.355865	0.815208	C	0.071573	-2.967893	0.597639
C	0.492995	-1.689559	0.199672	C	1.664522	1.812378	0.831273
C	2.575201	2.892286	0.685525	C	2.161020	4.085600	0.011266
C	0.875881	4.221439	-0.401966	C	2.039192	0.741408	1.670626
C	3.293341	0.680980	2.241374	C	4.232106	1.698981	1.998844
C	3.865005	2.795725	1.249753	C	-4.101429	-0.091569	-0.067601
C	-4.888612	0.756209	0.713350	C	-6.272936	0.703484	0.610298
C	-6.901618	-0.203695	-0.249282	C	-6.098456	-1.049654	-1.016591
C	-4.710122	-0.993070	-0.938494	C	-8.402567	-0.269017	-0.330128
O	1.116720	-3.839983	0.687572	C	2.209939	-3.162427	0.260816
C	1.904750	-1.860053	-0.116687	C	3.491080	-3.736329	0.197299
C	4.490308	-2.961141	-0.327152	C	4.224981	-1.663528	-0.859797
C	2.912292	-1.109245	-0.800967	C	5.252859	-0.930833	-1.503492
C	4.991886	0.273526	-2.110979	C	3.674979	0.780720	-2.120385
C	2.661736	0.102573	-1.483244	H	-1.699356	4.346639	-1.015414
H	-3.408939	2.554780	-0.735097	H	-3.282103	-2.658385	0.690597
H	-1.482670	-4.373952	1.104036	H	2.876976	4.895805	-0.097110
H	0.525870	5.152088	-0.841430	H	1.317409	-0.037101	1.884964
H	3.554355	-0.158265	2.878708	H	5.226329	1.637567	2.430183
H	4.557413	3.619621	1.096531	H	-4.407623	1.448297	1.397863
H	-6.879901	1.370524	1.216958	H	-6.566809	-1.755558	-1.697219
H	-4.092448	-1.638509	-1.555513	H	-8.726214	-0.883529	-1.174435
H	-8.836304	0.729342	-0.444867	H	-8.826285	-0.702936	0.582546
H	3.657731	-4.747007	0.552094	H	5.505013	-3.343695	-0.393464
H	6.253120	-1.356246	-1.521140	H	5.787519	0.821813	-2.605467
H	3.457179	1.712133	-2.634517	H	1.646623	0.481013	-1.518027

[truncated: 10 more sheets: 5b (1st), 5b (2nd), 6a (1st), 6a (2nd), 6b (1st), 6b (2nd), 6b-TS, 6a-TS, 5a-TS, 5b-TS]
